# benchNGS : An approach to benchmark short reads alignment tools

Farzana Rahman<sup>a</sup>, Mehedi Hassan<sup>a</sup>, Alona Kryshchenko<sup>b</sup>, Inna Dubchak<sup>d</sup>,  
Nickolai Alexandrov<sup>c</sup>, Tatiana V. Tatarinova<sup>b</sup>

<sup>a</sup>University of South Wales, UK

<sup>b</sup>University of Southern California, USA

<sup>c</sup>International Rice Research Institute, Philippines

<sup>d</sup>Joint Genome Institute, USA

## Abstract

In the last decade a number of algorithms and associated software were developed to align next generation sequencing (NGS) reads to relevant reference genomes. The results of these programs may vary significantly, especially when the NGS reads are contain mutations not found in the reference genome. Yet there is no standard way to compare these programs and assess their biological relevance.

We propose a benchmark to assess accuracy of the short reads mapping based on the pre-computed global alignment of closely related genome sequences. In this paper we outline the method and also present a short report of an experiment performed on five popular alignment tools.

**Keywords:** Benchmark, NGS, alignment, short reads, BLAST, SOAP, Bowtie, bwa, SHRiMP

## Introduction

Next Generation Sequencing (NGS) technologies provide fast and cost-effective alternatives to the established Sanger sequencing, and powers impressive scientific achievements and development of novel biological applications in medicine, ecology, forensics, epidemiology and other fields of science [30, 31]. High throughput NGS technology comes with challenges in managing large datasets and the “big data” questions in biology. Open access publications and public domain data liberation, made way for development of a plethora of tools for analysis of these datasets. With hourly paid cloud-based computing services being increasingly available, researchers are now in need of a benchmark method to select the perfect tool, that is fit for

33 purpose. Our endeavor is to establish a benchmark method for short read  
34 aligning tools.

35

36 De novo assembly of long sequence reads from Sanger-based sequencing  
37 process produces reliable genomic sequences [27]. Sanger sequence reads are  
38 typically 650 to 850 bases long while the NGS methods produce much shorter  
39 reads that are 50-450 bases long. The reads are assembled to chromosomes  
40 using well established algorithms, such as Celera Assembler[23], Arachne [2],  
41 Atlas, CAP3 [15], Euler [26], PCAP[16], Phrap [11, 12], RePS [34], Phusion  
42 [22]. Most of the assemblers follow the “overlap-layout-consensus” algorithmic  
43 strategy [25] or are based on a de Bruijn graph[7]. Usually, the “overlap”  
44 portion of the assembly process is the most computationally intensive. Using  
45 NGS reads for assembling whole genomes significantly reduces the costs  
46 of genome sequencing.

47

48 However, most of the existing sequence assembly programs are not suffi-  
49 cient enough for short sequence reads generated by NGS methods [24]. This  
50 is partly because, the information contained in a short read is not sufficient  
51 to find a position of a read in a genome [36]. Moreover, the number of  
52 NGS reads is several orders of magnitude larger than the Sanger sequencing  
53 reads. For a novel or little-explored genomes, this can prove very difficult.  
54 Therefore, different algorithmic strategies more suitable for the short reads  
55 assembly have been developed. Usage of two sets of restriction enzymes cre-  
56 ates overlapping libraries and reduces errors. It is also possible to use long  
57 and short reads together to take advantage of the low cost of NGS sequenc-  
58 ing and computational unambiguity of long reads [35, 32, 8]. Finally, there  
59 is an “alignment-layout-consensus” approach that uses a reference genome.  
60 One of the implementations of this strategy is AMOS Comparative Assem-  
61 bler [27].

62

63 When a reference genome is used to guide a sequence assembly, the  
64 quality of the resulting assembly depends on the specific algorithm used,  
65 on frequency of repeats in the pair of genomes, and evolutionary distance  
66 between them. In addition, insertions in the target genome cannot be assem-  
67 bled using the “alignment-layout-consensus” approach and presence of re-  
68 arrangements will negatively affect the quality of assembled contigs [27]. It  
69 has been demonstrated [27] that the “alignment-layout-consensus” approach  
70 works well for a pair of strains of the same bacteria (92-94% coverage of the  
71 target genome), but fails for more distinct sequences (11.4% coverage of the  
72 target genome using more diverse organisms such as *Streptococcus agalactiae*

73 vs. *Streptococcus pyogenes*). *S. pyogenes* is a human pathogen, exclusively  
 74 adapted to the human host, and *S. agalactiae* is one of the principal causes  
 75 of bovine *Streptococcal mastitis* [21]. An array of computationally efficient  
 76 tools for mapping of short reads onto reference genomes, such as SOAP,  
 77 Bowtie, SHRiMP and BWA, has been developed. Well-established sequence  
 78 alignment tools like BLAST [1] can also handle short reads alignment.

79  
 80 It is important to determine the limits of applicability of the reference-  
 81 based alignment method depending on the divergence between the reference  
 82 and target species. In this paper we chose a simulation approach using global  
 83 whole genome alignments as gold standards. Simulation enables us to gen-  
 84 erate “NGS reads” of arbitrary length without investing in sequencing, map  
 85 them to a reference genome and assess the correctness of a mapped position.  
 86 To estimate error rate of these programs we propose a benchmark, which  
 87 uses the large-scale alignment between syntenic regions of genome sequences  
 88 as the true alignment. The aligned fragments of the whole genome alignment  
 89 were cut into short sequence ‘reads and the ability of different programs to  
 90 reproduce the true alignment using these reads was tested. This proposed  
 91 benchmark is a convenient way to select programs that are most suitable  
 92 for the reference-based genome assembly. It gives clear, realistic and robust  
 93 estimates of the accuracy of the alignment programs. The benchmark also  
 94 defines the limits of sequence similarities for selecting a reference genome.

95  
 96 In this paper, we compare performance of the five popular freely avail-  
 97 able alignment programs using whole-genome alignment between between  
 98 several strains of model bacteria *Escherichia coli* and between *E. coli* and  
 99 several species of *Salmonella*. We focused our analysis on bacterial species  
 100 for a number of reasons. They have manageable size genomes, variety of  
 101 nucleotide composition, and alignment of bacterial reads to genomes is es-  
 102 sential for environmental and clinical applications, annotation of variants,  
 103 determination of toxicity, drug resistance and pathogenicity of the analyzed  
 104 strain [3],[33].

105

## 106 Proposed Methods

107 We propose the following procedures to institute the benchmark method.  
 108 To evaluate the effectiveness of an alignment tool, we propose to compare  
 109 the alignments done by the tool with a gold standard alignment from other  
 110 independent sources. Researchers at various laboratories have invested ef-  
 111 fort in obtaining a consensus global alignment among several model species.  
 112 We intend to make use of these alignments to achieve a single benchmark  
 113 score for a given tool.

114  
 115 Our procedure starts by extracting the reference genome and query  
 116 genome from a peer reviewed global alignment. We call this the “Gold  
 117 Standard Alignment (GSA)”. By removing all the gaps from aligned se-  
 118 quences, we form the complete genome for reference and query genome. We  
 119 then split the query sequence into short reads of variant base pair lengths.  
 120 The philosophy is that, a “perfect” tool *per se*, will be able to align these  
 121 small sequence fragments to their accurate alignment positions within the  
 122 reference genome, replicating the results of GSA. The precision rate close to  
 123 1.0 will present a “near perfect” tool [28].

124  
 125 Different alignment tool produces alignment results in different format.  
 126 Our procedure do not discriminate the tools based on the tool’s own claim  
 127 of accuracy. For example, the E-value reported by the BLAST tool is not  
 128 carried towards the result of our scoring. We collect an information set,  $\mathbb{R}$   
 129 from the alignment results containing: (i) read id ( $r(n)$ ), (ii) reference se-  
 130 quence identifier (ref), (iii) start position of the read (stp). This information  
 131 is then compared with their counterparts from the GSA.

132  
 133 To evaluate the quality of mapping of reads to the reference genome, we  
 134 used a scoring method formed of True positives (TP), False Positive (FP),  
 135 False Negative (FN). When a short read or fragment is mapped exactly to  
 136 the same position on the reference genome as defined by GSA, we award one  
 137 point towards TP. If a fragment is mapped to a different position than the  
 138 one defined by the global alignment, a penalty is awarded to FP. However, if  
 139 the candidate tool failed to align a fragment to the correct location as GSA,  
 140 then a penalty point is awarded to FN.

141  
 142 To conclude benchmark of a candidate tool, we use Rijsbergen’s  $F1$  score  
 143 as a measure of test accuracy [28].

144

We used true positive rate ( $r$ ) and positive predictive rate ( $p$ ), to compute  $F1$  score. Sensitivity or true positive rate, alternatively called as Recall. A recall measures the probability of actually mapped reads. The true positive rate is computed by dividing the total number of correct results by the number of alignments that were expected:  $r = TP/(TP + FN)$ .

Positive predictive value or alternatively called as Precision. Precision measures the probability of positively mapped reads by dividing the total number of correct alignments by total number of alignments detected by the tool:  $p = TP/(TP + FP)$ .

The  $F1$  score can be interpreted as a weighted average of the precision and recall, where an  $F1$  score reaches its best value at 1 and worst score at 0:

$$F1 = 2 \times ((p \times r)/(p + r)).$$

**Algorithm 1:** Benchmarking of a list of NGS Short Reads Aligner

**Data:** **GSA:** Gold Standard Alignment between two sequences

**Model, M:** Reference genome of GSA

**Query, Q:** Query genome of GSA

**Tools, T:** List of the candidate tools

**Initialization;**

**Data Preparation:** Simulate short reads,  $q(n) \subset Q$  of variant bp lengths  $n \in \{50, 100, 150, 400\}$ ;

**foreach**  $t \in T$  **do**

**foreach**  $q(n)$  **do**

        Align the reads to the model genome;

        From new alignment results generate  $R \leftarrow \{q(n), ref, stp\}$  :

        Compare  $R$  with GSA and produce a set  $S \leftarrow \{TP, FP, FN\}$  where

        True Positive Rate,  $r \leftarrow \frac{TP}{TP+FN}$ ;

        Positive Predictive Value,  $p \leftarrow \frac{TP}{TP+FP}$ ;

        Rijsbergen's accuracy measurement score,  $F_1 = 2 * \frac{p*r}{p+r}$

**end**

**end**

**Result:** Benchmark Score,  $F_1$

Table 1: List of paired strains and their whole genome alignment statistics

| Genome                                | Accession   | Identity | Al. Length |
|---------------------------------------|-------------|----------|------------|
| <i>S. enterica</i> Typhi Ty2          | NC_004631.1 | 56.58    | 29480      |
| <i>S. enterica</i> Typhi CT18         | NC_003198.1 | 54.43    | 29159      |
| <i>S. typhimurium</i> LT2             | NC_003197.1 | 58.02    | 29025      |
| <i>S. enterica</i> Paratyphi-A SARB42 | NC_006511.1 | 52.91    | 32221      |
| <i>E. coli</i> O157:H7 EDL933         | NC_002655.2 | 76.38    | 34335      |
| <i>E. coli</i> K12                    | NC_000913.2 | 79.48    | 38457      |
| <i>E. coli</i> Sakai O157:H7          | NC_002695.1 | 77.46    | 34316      |

## 161 Implementation

162 We designed an experiment using model species *Escherichia sp.* and  
 163 *Salmonella sp.* For our test cases we used pre-computed global alignments  
 164 of the following pairs of bacterial strains done by the VISTA consortium of  
 165 Lawrence Berkeley National Laboratory and Joint Genome Institute [13, 10].

166  
 167 For this experiment, we used seven pairs of alignments between *Es-*  
 168 *cherichia coli* O6 CFT073 and seven other strains from *Escherichia* and  
 169 *Salmonella*. Table 1 contains a list of paired strains together with whole  
 170 genome alignment statistics. Average percent identity is calculated as the  
 171 number of identical nucleotides divided by the alignment length. Aver-  
 172 age alignment length computed as from all fragments in the corresponding  
 173 whole-genome alignment.

## 174 GSA Selection Justification

175 We chose VISTA global alignments as GSA as the used technique gen-  
 176 erates long continuous DNA fragments of Orthologous genomics intervals.  
 177 VISTA uses a combination of global and local alignment methods consisting  
 178 of three steps; (a) obtaining a map of large blocks of conserved synteny be-  
 179 tween the two species by applying Shuffle-LAGAN global chaining algorithm  
 180 [5] to local alignments by translated BLAT [17]; (b) using Supermap [9], the  
 181 fully symmetric whole-genome extension to the Shuffle-LAGAN [4], and (c)  
 182 applying Shuffle-LAGAN the second time on each syntenic block to obtain  
 183 a more fine-grained map of small-scale rearrangements.

## 184 Short Reads Simulation

185 As proposed in the method, to maintain consistency we used *Escherichia*  
 186 *coli* O6 CFT073 genome as a reference genome. We used the second genome

Table 2: List of alignment tools used

| Tool Name                                      | Version Used |
|------------------------------------------------|--------------|
| BLAST+: NCBI Basic Local Alignment Search Tool | 2.2.26       |
| Bowtie 2: Bowtie Short Read Aligner            | 2.1.0        |
| SHRiMP: SHort Read Mapping Package             | 2.2.3        |
| SOAP2: Short Oligonucleotide Analysis Package  | 2.2.1        |
| BWA: Burrows-Wheeler Aligner                   | 0.7.0        |

187 from each pairings as the query genome. Using a simple R program, we  
188 simulated short reads of lengths of  $n$  bp where  $n=50, 100, 150, 400$  from the  
189 reads. Each nucleotide was used as a start point of a new read as long as  
190 they ended with a read of expected length ( $n$  bp).

# 191 *Selection of Candidate Tools*

192 There is a large number of alignment tools available in the public domain.  
193 We intend to use most (if not all) of the tools to produce a comprehensive  
194 benchmark database. However, for this case study we used the most popular  
195 alignment tool, BLAST from NCBI and four other relatively new alignment  
196 tools. Table 2 presents a list of the tools and their versions that was used.  
197 To maintain consistency, we did not use the latest versions of all the tools  
198 and rather dependent on the stable releases of the tools from a contemporary  
199 release time.

200 All of the tools were used as-is and without modification. Default pa-  
201 rameters were used and the user guides were consulted only to install and  
202 run examples as recommended by developers.

## 203 Results and Discussion

204 The aim of the experiment was to examine how the tools perform with  
205 reads of varying lengths. Very short reads of 50 base pairs and relatively  
206 longer reads 400 base pairs were of special interest. We used the evolutionary  
207 tree as a biological reference to observe accuracy of the benchmark. We  
208 expect that, if the genomes are identical, all five candidate programs should  
209 provide close alignments with high precision, yielding in F1 scores close to  
210 1. Likewise, the tools are expected to yield a lower F1 scores for alignments  
211 performed between more distant organisms.

212  
213 Our experiment demonstrated limits of sequence similarity for differ-  
214 ent programs. As expected, for alignments between various strains of same  
215 species (*E. coli*), all programs performed reasonably well, with the excep-  
216 tion of SOAP2. For shorter reads of 50bp and 100bp, all five candidate  
217 tools demonstrated good F1 scores. However, as the reads lengths started  
218 to increase, at 150bp and 400bp, SOAP and BWA did not stay in-par with  
219 BLAST+ and SHRiMP.

220  
221 For closely related genomes, BLAST+'s performance matched its repu-  
222 tation, however, for distant genomes, the performance was rather poor. For  
223 alignments between *Salmonella ep.* and *E. coli*, for reasonably shorter reads  
224 (50-100bp), BLAST+ was outperformed by SHRiMP. As the read lengths  
225 increased, BLAST+ showed a recovering trend.

226  
227 In our experiment, Bowtie started with a below-par accuracy score for  
228 short reads, and with the increase of reads lengths, the accuracy continued  
229 to decrease.

230  
231 In almost all cases SOAP2 ability was behind BLAST+ and SHRiMP,  
232 which can be explained by the fact that, mapping of the reads in SOAP2  
233 is mismatch-dependent. In an earlier study [36] it was observed that the  
234 suboptimal hits reduce from 21% to 1%, when mismatch rate was changed  
235 from 2 to 6 mismatches invoking the different behavior of the tool, which is  
236 partly dependent on the mismatch. More recently, it has been demonstrated  
237 that SOAP2 has a lower read mapping accuracy in meta-genome experiments  
238 and it shows 256 significant differences in the coverage depth[], which agrees  
239 with our findings.

240 For more distant species, SHRiMP performs significantly better. In al-  
241 most all cases, SOAP showed the worst performance. Poor performance of



242 SOAP can be explained by the fact that mapping of the reads in SOAP  
243 is mismatch-dependent. In an earlier study [14] it was observed that the  
244 suboptimal hits reduce from 21% to 1%, when mismatch rate was changed  
245 from 2 to 6 mismatches invoking the different behavior of the tool, which  
246 partially depends on the mismatch. More recently, it was demonstrated that  
247 SOAP has a lower read mapping accuracy in meta-genome experiments and  
248 it shows significant differences in the coverage depth [20], which agrees with  
249 our demonstrated results.

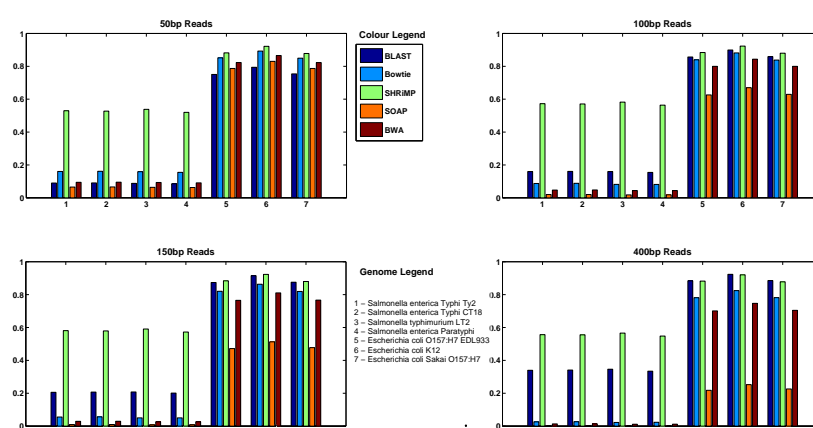

Figure 1: F1 Score for different reads lengths.

## 250 CONCLUSIONS

251 We developed and experimented a benchmark strategy to assess the cor-  
252 rectness of alignments produced by different tools. We tested our method  
253 on five tools and on a set of case study data. Our tested method proves  
254 our hypothesis about closely related genomes. If the genomes are identical,  
255 the tools perform well. If the genomes are distantly related by evolution  
256 such as E.coli and Salmonella, the tools perform differently. In our case,  
257 SHRiMP over-performs rest of the tools and SOAP performed reasonably  
258 bad. BLAST and Bowtie performed well after SHRiMP. BLAST showed  
259 consistent result as per our hypothesis. We conducted this experiment on a  
260 set of data to establish the benchmark method. We aim to extend our study  
261 for different species ( i.e *Homo sapiens* vs *Pan troglodytes*) and adding a  
262 range of different tools for comparative analysis.

## 263 Availability of Supporting Data

264 The gold standard global alignments were collected from VISTA website  
265 available at :  
266 <http://pipeline.lbl.gov/data/ecoli2/>.

267  
268 Simulated reads and outputs of BLAST, Bowtie, SHRiMP and SOAP are  
269 accessible via <http://cbio.uk/benchNGS/>. UNIX executable of a program  
270 created using this algorithm is also available at the same link.

## 271 ACKNOWLEDGEMENTS

272 The authors are grateful to Alexandre Poliakov for his work on whole-  
273 genome alignments.

## 274 Funding

275 FR was supported by HPC-Wales and Fujitsu Lab Europe. TT was  
276 supported by grants from The National Institute for General Medical Studies  
277 (GM068968), and the Eunice Kennedy Shriver National Institute of Child  
278 Health and Human Development (HD070996).

## 279 Authors Contributions

280 TT and AN conceptualized the benchmark and proposed initial frame-  
281 work. ID, FR, AK, MH designed the experiment, performed the case study,  
282 generated results and prepared manuscript. FR, TT, ID and NA interpreted  
283 the results and wrote the manuscript.

## 284 References

- 285 [1] Altschul, S. F., Gish, W., Miller, W., Myers, E. W., Lipman, D. J.,  
286 et al., 1990. Basic local alignment search tool. *Journal of molecular*  
287 *biology* 215 (3), 403–410.
- 288 [2] Batzoglou, S., Jaffe, D. B., Stanley, K., Butler, J., Gnerre, S., Mauceli,  
289 E., Berger, B., Mesirov, J. P., Lander, E. S., Jan. 2002. Arachne: a  
290 whole-genome shotgun assembler. *Genome Res* 12 (1), 177–89.
- 291 [3] Bolshoy, A., Salih, B., Cohen, I., Tatarinova, T., 2014. Ranking of  
292 prokaryotic genomes based on maximization of sortedness of gene  
293 lengths. *J Data Mining Genomics Proteomics* 5 (151).

- 294 [4] Brudno, M., 2007. An introduction to the lagan alignment toolkit.  
295 Methods Mol Biol 395 (4), 205–220.
- 296 [5] Brudno, M., Malde, S., Poliakov, A., Do, C. B., Couronne, O.,  
297 Dubchak, I., Batzoglou, S., 2003. Glocal alignment: finding rearrange-  
298 ments during alignment. Bioinformatics 19 (suppl 1), i54–i62.
- 299 [6] Camacho, C., Coulouris, G., Avagyan, V., Ma, N., Papadopoulos, J.,  
300 Bealer, K., Madden, T., 2009. Blast+: architecture and applications.  
301 BMC Bioinformatics 10 (1), 421.  
302 URL <http://www.biomedcentral.com/1471-2105/10/421>
- 303 [7] de Bruijn, N. G., Jun. 1946. A Combinatorial Problem. Koninklijke  
304 Nederlandsche Akademie Van Wetenschappen 49 (6), 758–764.
- 305 [8] DiGiustini, S., Liao, N., Platt, D., Robertson, G., Seidel, M., Chan,  
306 S., Docking, T. R., Birol, I., Holt, R., Hirst, M., Mardis, E., Marra,  
307 M., Hamelin, R., Bohlmann, J., Breuil, C., Jones, S., 2009. De novo  
308 genome sequence assembly of a filamentous fungus using Sanger, 454  
309 and Illumina sequence data. Genome Biology 10 (9), R94+.  
310 URL <http://dx.doi.org/10.1186/gb-2009-10-9-r94>
- 311 [9] Dubchak, I., Poliakov, A., Kislyuk, A., Brudno, M., 2009. Multiple  
312 whole-genome alignments without a reference organism. Genome Re-  
313 search 19 (4), 682–689.
- 314 [10] Dubchak, I., Poliakov, A., Kislyuk, A., Brudno, M., 2009-04-01  
315 00:00:00.0. Multiple whole-genome alignments without a reference or-  
316 ganism. Genome Research 19 (5), 682–9.
- 317 [11] Ewing, B., Green, P., 1998. Base-calling of automated sequencer traces  
318 using phred. ii. error probabilities. Genome Research 8 (3), 186–194.  
319 URL <http://genome.cshlp.org/content/8/3/186.abstract>
- 320 [12] Ewing, B., Hillier, L., Wendl, M. C., Green, P., 1998. Base-calling of  
321 automated sequencer traces usingphred.i. accuracyassessment. Genome  
322 Research 8 (3), 175–185.  
323 URL <http://genome.cshlp.org/content/8/3/175.abstract>
- 324 [13] Frazer, K. A., Pachter, L., Poliakov, A., Rubin, E. M., Dubchak, I.,  
325 2004. VISTA: computational tools for comparative genomics. Nucleic  
326 Acids Research 32 (Web-Server-Issue), 273–279.  
327 URL <http://dx.doi.org/10.1093/nar/gkh458>

- 328 [14] Hatem, A., Bozdag, D., Toland, A., Catalyurek, U., 2013. Benchmark-  
329 ing short sequence mapping tools. BMC Bioinformatics 14 (184).
- 330 [15] Huang, X., Madan, A., 1999. Cap3: A dna sequence assembly program.  
331 Genome Research 9 (9), 868–877.  
332 URL <http://genome.cshlp.org/content/9/9/868.abstract>
- 333 [16] Huang, X., Wang, J., Aluru, S., Yang, S.-P., Hillier, L., 2003. Pcap: A  
334 whole-genome assembly program. Genome Research 13 (9), 2164–2170.  
335 URL <http://genome.cshlp.org/content/13/9/2164.abstract>
- 336 [17] Kent, W. J., 4 2002. BLAT – The BLAST-Like Alignment Tool.  
337 Genome Research 12 (4), 656–664.
- 338 [18] Langmead, B., Trapnell, C., Pop, M., Salzberg, S., 2009. Ultrafast  
339 and memory-efficient alignment of short dna sequences to the human  
340 genome. Genome Biology 10 (3), R25.
- 341 [19] Li, R., Li, Y., Kristiansen, K., 0004, J. W., 2008. Soap: short oligonu-  
342 cleotide alignment program. Bioinformatics 24 (5), 713–714.
- 343 [20] Martin, J., Sykes, S., Young, S., Kota, K., Sanka, R., et al., 2012.  
344 Optimizing read mapping to reference genomes to determine composi-  
345 tion and species prevalence in microbial communities. PLoS ONE 7 (6),  
346 e36427.
- 347 [21] Mickelson, M., 1966. Effert of lactoperoxidase and thiocyanate on the  
348 growth of streptococcus pyogenes and streptococcus agalactiae in a  
349 chemically defined culture medium. Journal of general microbiology  
350 43 (1), 31–43.
- 351 [22] Mullikin, J. C., Ning, Z., 2003. The phusion assembler. Genome Re-  
352 search 13 (1), 81–90.  
353 URL <http://genome.cshlp.org/content/13/1/81.abstract>
- 354 [23] Myers, E. W., Sutton, G. G., Delcher, A. L., Dew, I. M., Fasulo, D. P.,  
355 Flanigan, M. J., Kravitz, S. A., Mobarry, C. M., Reinert, K. H. J.,  
356 Remington, K. A., Anson, E. L., Bolanos, R. A., Chou, H.-H., Jordan,  
357 C. M., Halpern, A. L., Lonardi, S., Beasley, E. M., Brandon, R. C.,  
358 Chen, L., Dunn, P. J., Lai, Z., Liang, Y., Nusskern, D. R., Zhan, M.,  
359 Zhang, Q., Zheng, X., Rubin, G. M., Adams, M. D., Venter, J. C., 2000.  
360 A whole-genome assembly of drosophila. Science 287 (5461), 2196–2204.  
361 URL <http://www.sciencemag.org/content/287/5461/2196.abstract>

- 362 [24] Paszkiewicz, K., Studholme, D., 2010. De novo assembly of short se-  
363 quence reads. *Briefings in bioinformatics* 11 (5), 457–472.
- 364 [25] Peltola, H., Soderlund, H., Ukkonen, E., 1984. Seqaid: a dna sequence  
365 assembling program based on a mathematical model. *Nucleic Acids*  
366 *Research* 12 (1), 307–321.
- 367 [26] Pevzner, P. A., Tang, H., Waterman, M. S., 2001. A new approach  
368 to fragment assembly in dna sequencing. In: *Proceedings of the Fifth*  
369 *Annual International Conference on Computational Biology. RECOMB*  
370 *'01*. ACM, New York, NY, USA, pp. 256–267.  
371 URL <http://doi.acm.org/10.1145/369133.369230>
- 372 [27] Pop, M., Phillippy, A., Delcher, A. L., Salzberg, S. L., 2004. Compara-  
373 tive genome assembly. *Briefings in Bioinformatics* 5 (3), 237–248.  
374 URL <http://bib.oxfordjournals.org/content/5/3/237.abstract>
- 375 [28] Rijsbergen, C. J. V., 1979. *Information Retrieval*, 2nd Edition.  
376 Butterworth-Heinemann, Newton, MA, USA.
- 377 [29] Rumble, S. M., Lacroute, P., Dalca, A. V., Fiume, M., Sidow, A.,  
378 Brudno, M., 2009. Shrimp: Accurate mapping of short color-space  
379 reads. *PLoS Computational Biology* 5 (5).
- 380 [30] Schuster, S. C., 2007. Next-generation sequencing transforms today's  
381 biology. *Nature Methods* 5 (1).
- 382 [31] Solovyev, V., Tatarinova, T., 2011. Towards the integration of ge-  
383 nomics, epidemiological and clinical data. *Genome Medicine* 3 (7), 48.  
384 URL <http://genomemedicine.com/content/3/7/48>
- 385 [32] Swaminathan, K., Alabady, M., Varala, K., De Paoli, E., Ho, I.,  
386 Rokhsar, D., Arumuganathan, A., Ming, R., Green, P., Meyers, B.,  
387 Moose, S., Hudson, M., 2010. Genomic and small rna sequencing of  
388 miscanthus x giganteus shows the utility of sorghum as a reference  
389 genome sequence for andropogoneae grasses. *Genome Biology* 11 (2),  
390 R12.  
391 URL <http://genomebiology.com/2010/11/2/R12>
- 392 [33] Tatarinova, T., Salih, B., Dien Bard, J., Cohen, I., Bolshoy, A., 2014.  
393 Lengths of orthologous prokaryotic proteins are affected by evolutionary  
394 factors. *BioMed Research International*.

- 395 [34] Wang, J., Wong, G. K.-S., Ni, P., Han, Y., Huang, X., Zhang, J., Ye, C.,  
396 Zhang, Y., Hu, J., Zhang, K., Xu, X., Cong, L., Lu, H., Ren, X., Ren,  
397 X., He, J., Tao, L., Passey, D. A., Wang, J., Yang, H., Yu, J., Li, S.,  
398 2002. Reps: A sequence assembler that masks exact repeats identified  
399 from the shotgun data. *Genome Research* 12 (5), 824–831.
- 400 [35] Wicker, T., Schlagenhauf, E., Graner, A., Close, T., Keller, B., Stein,  
401 N., 2006. 454 sequencing put to the test using the complex genome of  
402 barley. *BMC Genomics* 7 (1), 275.  
403 URL <http://www.biomedcentral.com/1471-2164/7/275>
- 404 [36] Young, A. L., Abaan, H. O., Zerbino, D., Mullikin, J. C., Birney, E.,  
405 Margulies, E. H., Feb. 2010. A new strategy for genome assembly us-  
406 ing short sequence reads and reduced representation libraries. *Genome*  
407 *Research* 20 (2), 249–256.  
408 URL <http://dx.doi.org/10.1101/gr.097956.109>

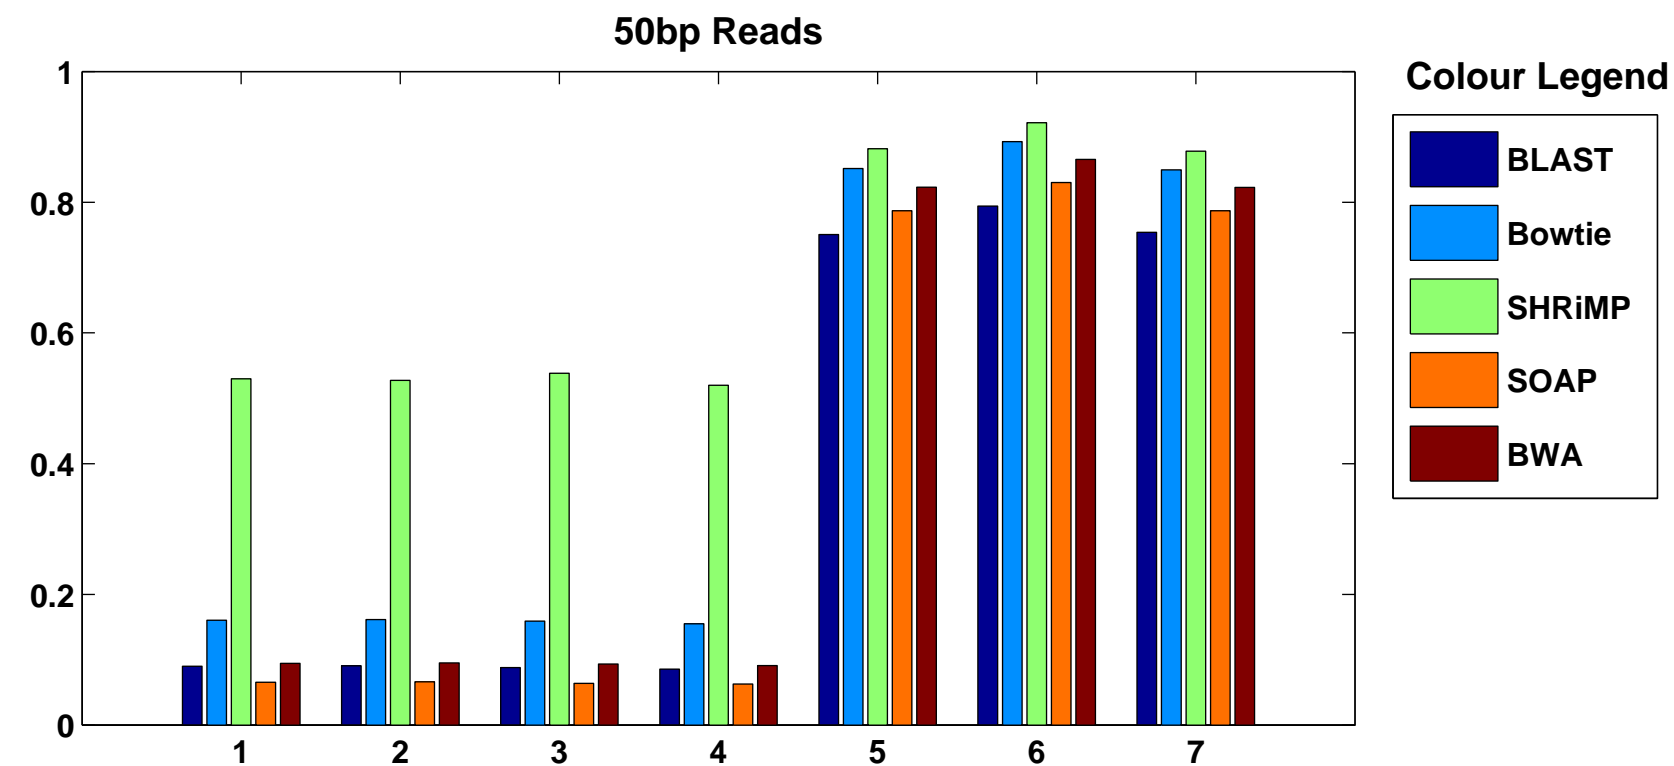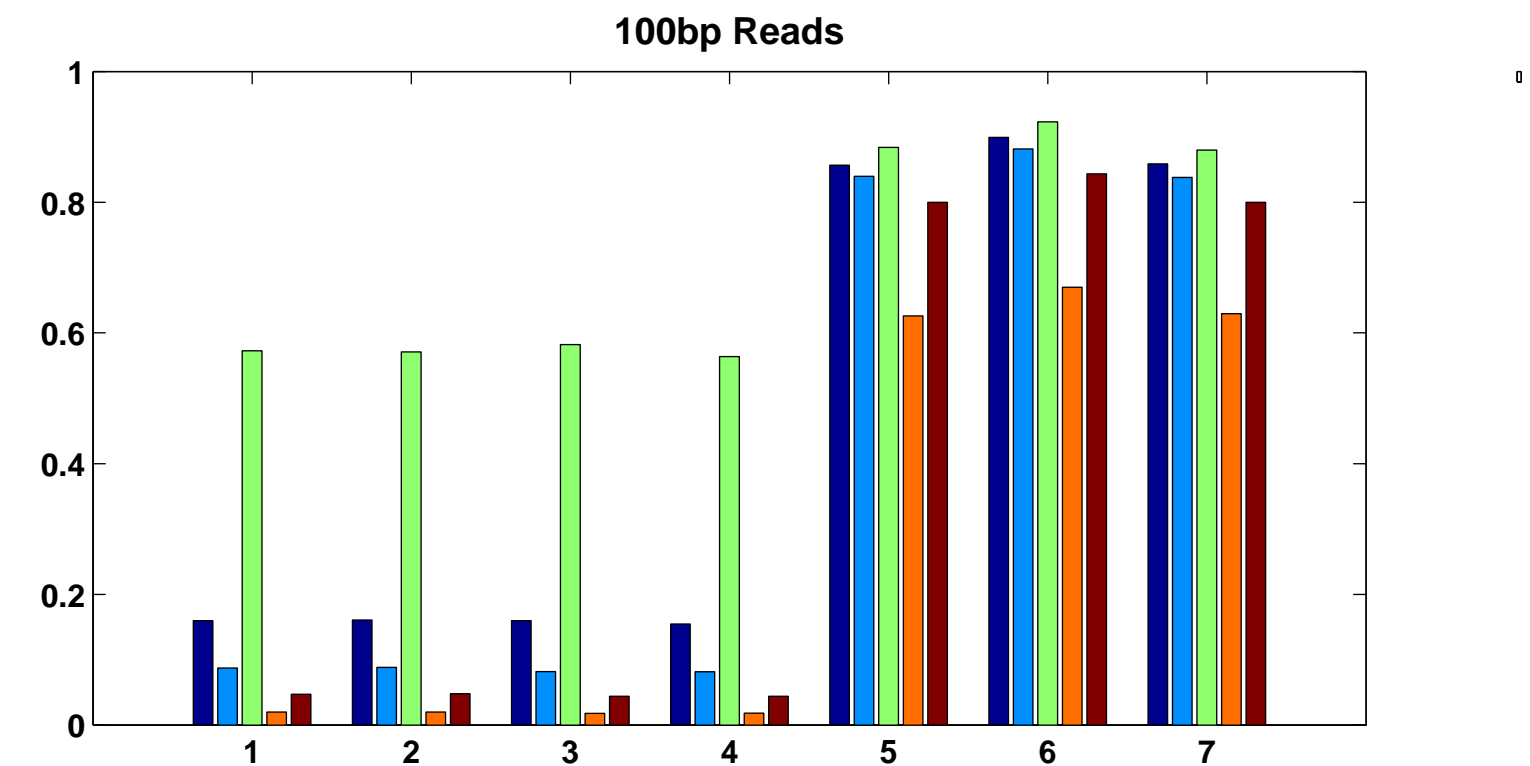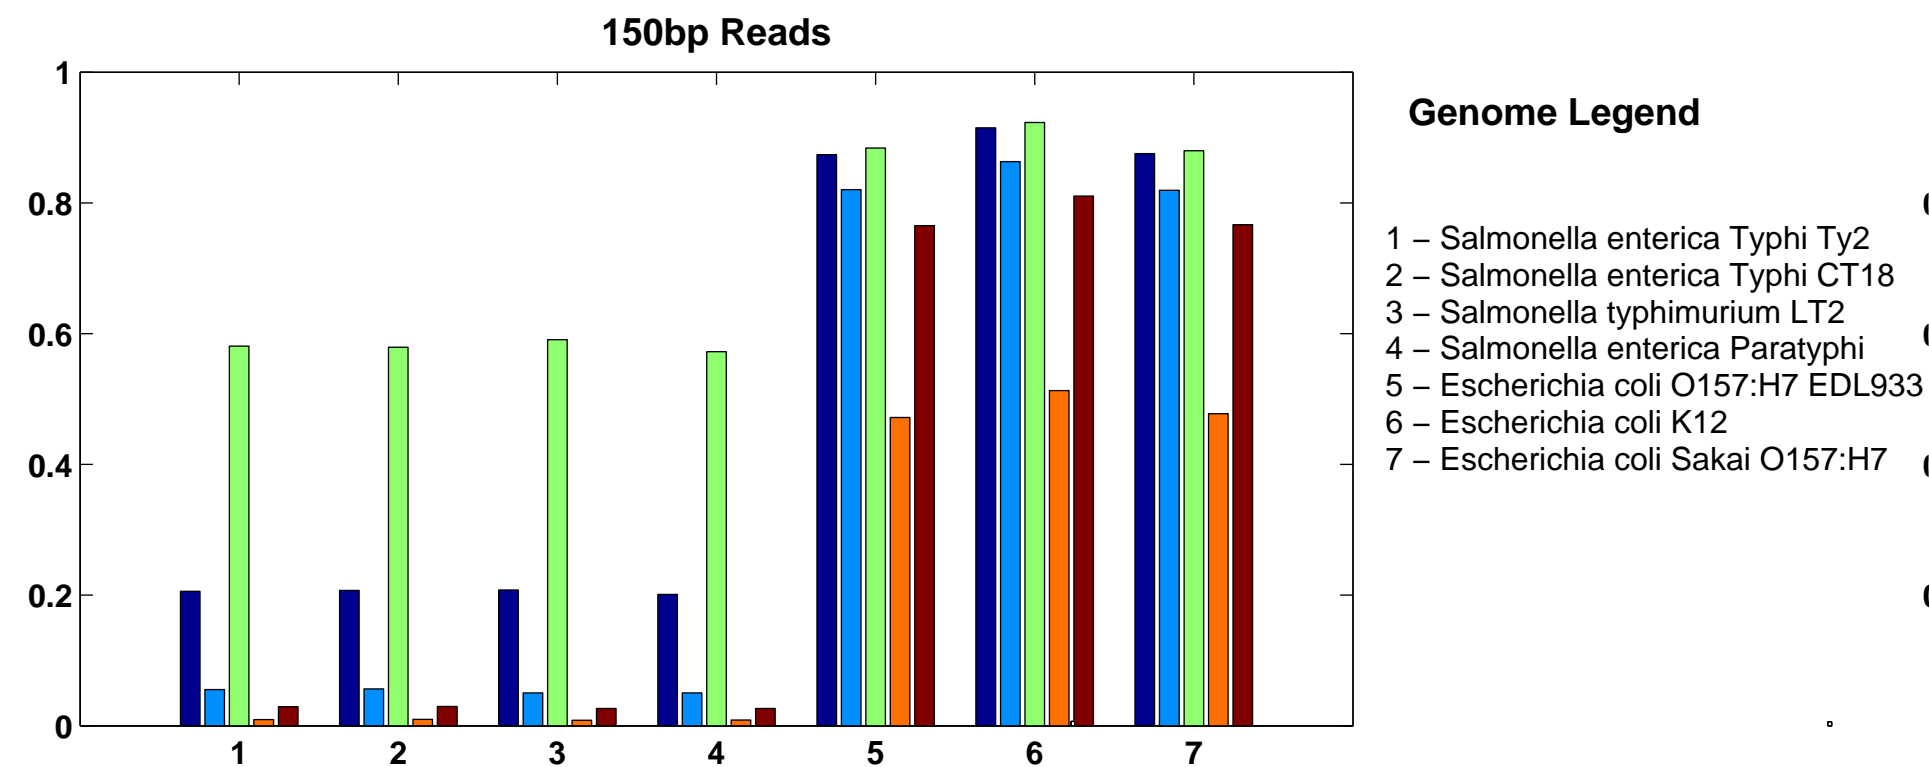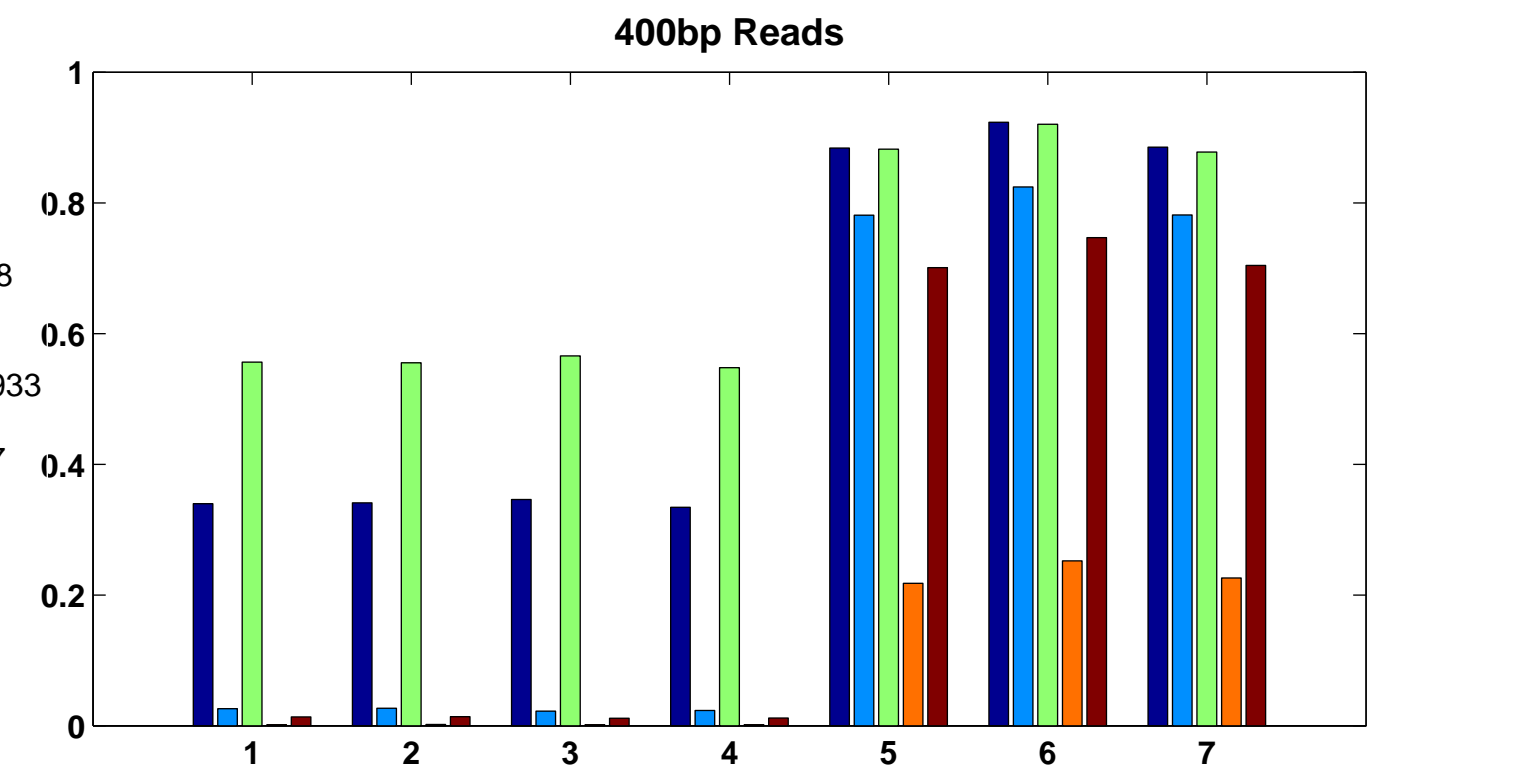

Source: https://www.biorxiv.org/content/10.1101/018234v1.full.pdf
